# Supplementary material for: Comparative Metabolite Profile, Biological Activity and Overall Quality of Three Lettuce (Lactuca sativa L., Asteraceae) Cultivars in Response to Sulfur Nutrition
Source: MDPI journal article supplement (doi:10.3390/pharmaceutics13050713), 2021-05-13
Supplement: s1 [file s1]

# Supplementary Materials: Comparative Metabolite Profile, Biological Activity and Overall Quality of Three Lettuce (*Lactuca sativa* L., Asteraceae) Cultivars in Response to Sulfur Nutrition

Muna Ali Abdalla, Fengjie Li, Arlette Wenzel-Storjohann, Saad Sulieman, Deniz Tasdemir and Karl H. Mühling

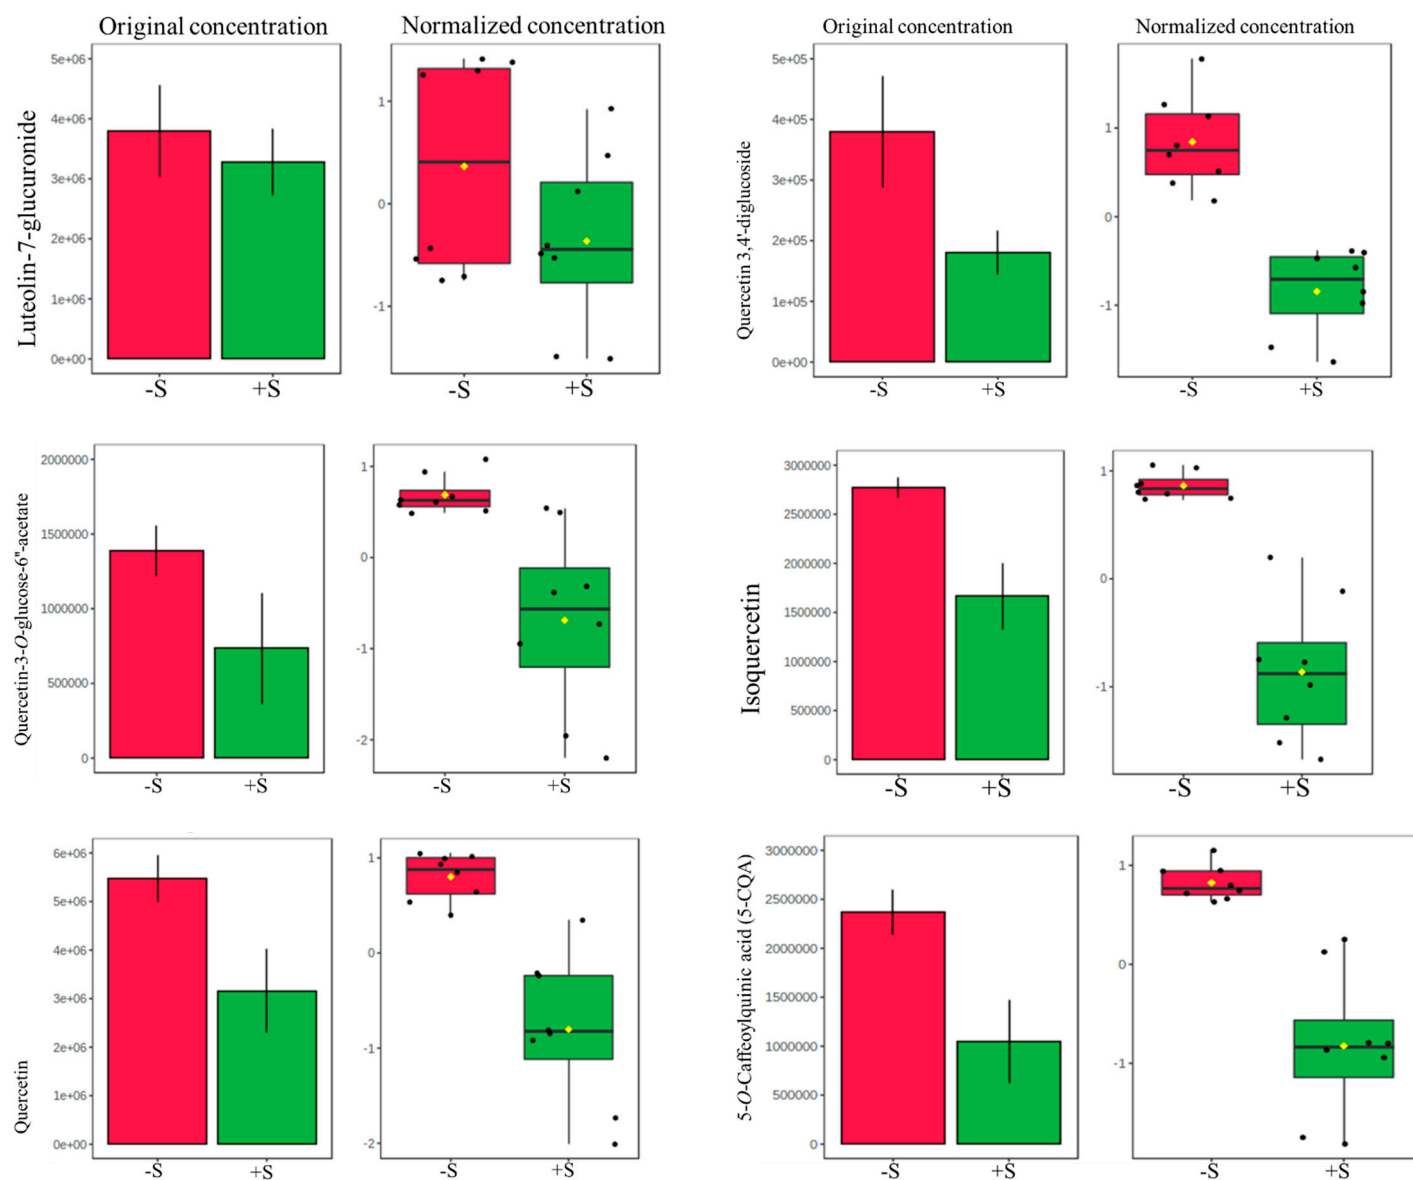

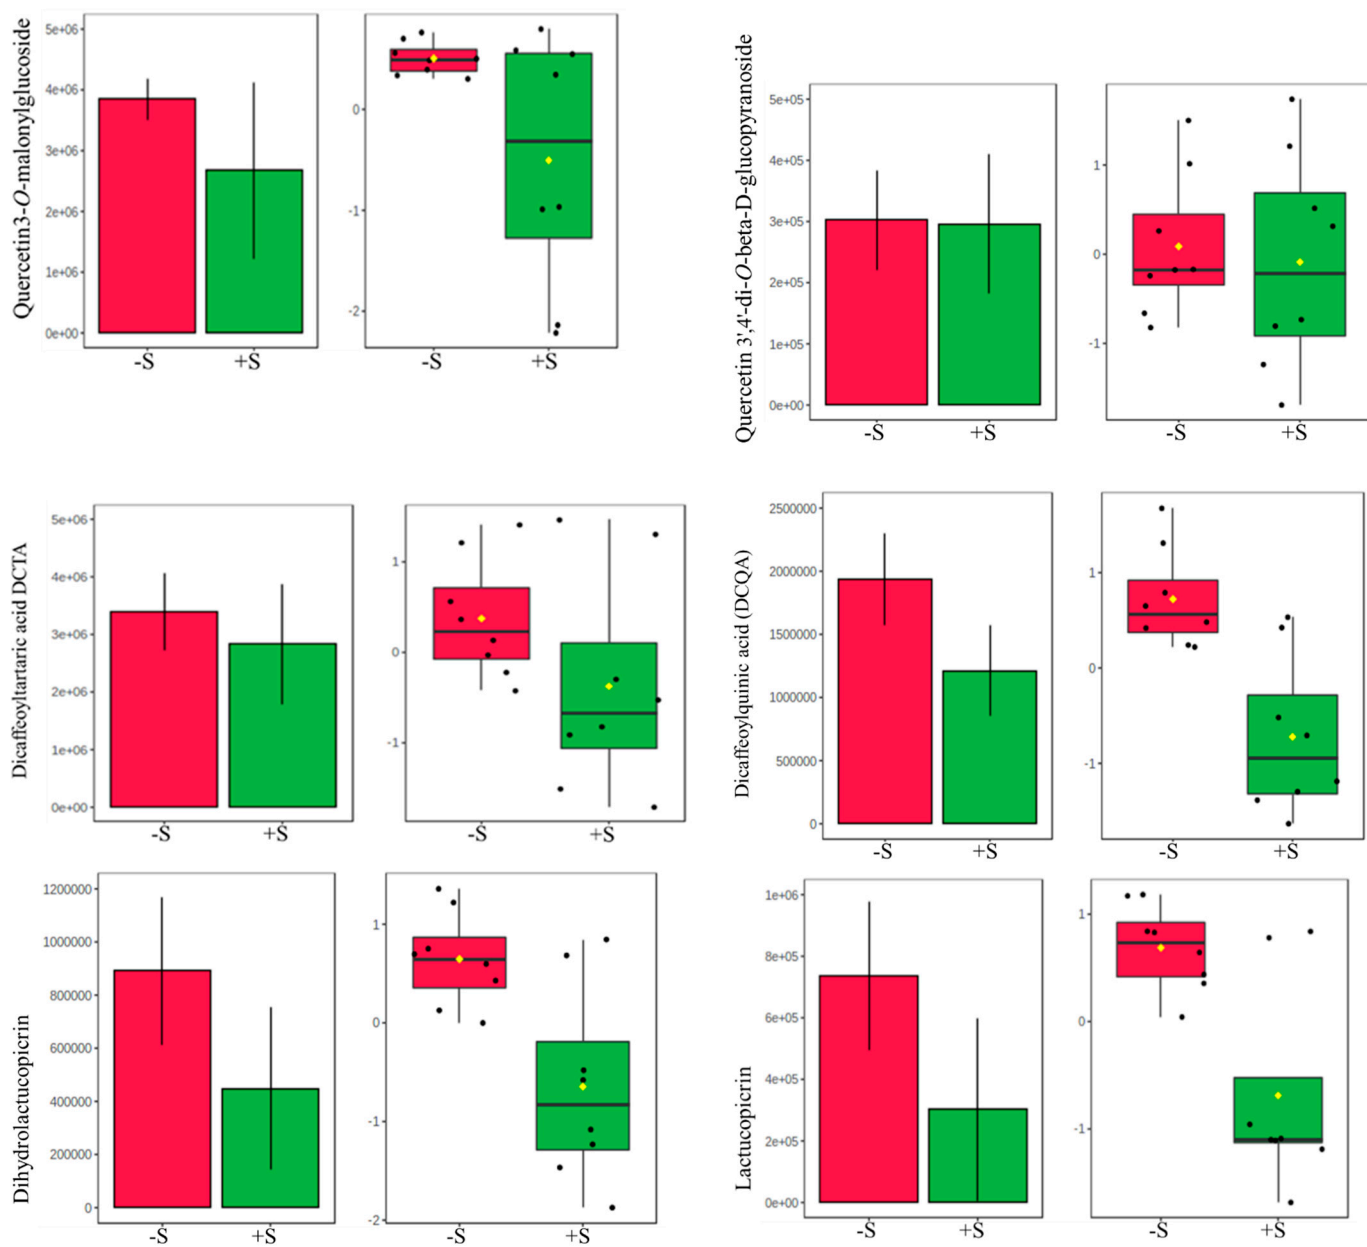

**Figure S1.** Detailed quantitative analysis of compounds detected in multi-leaf green lettuce (V2) grown under +S and -S conditions.

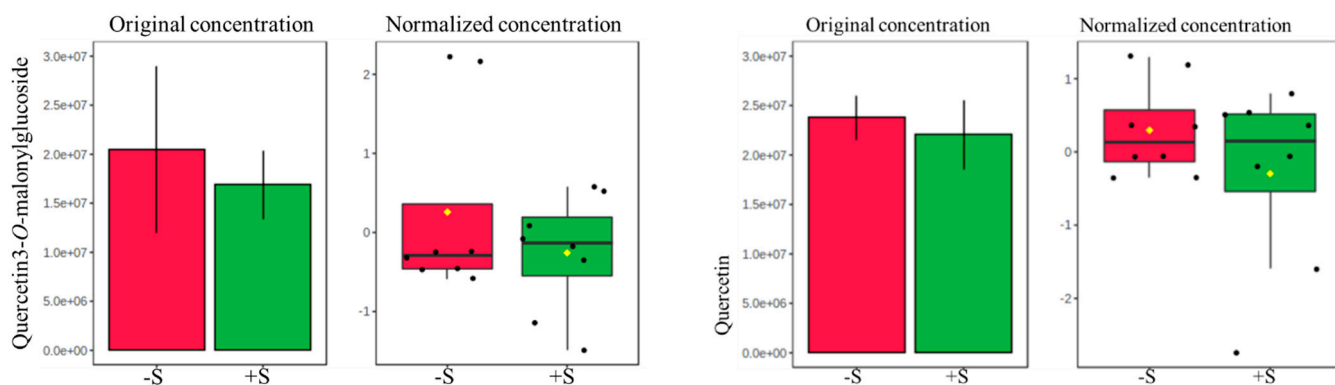

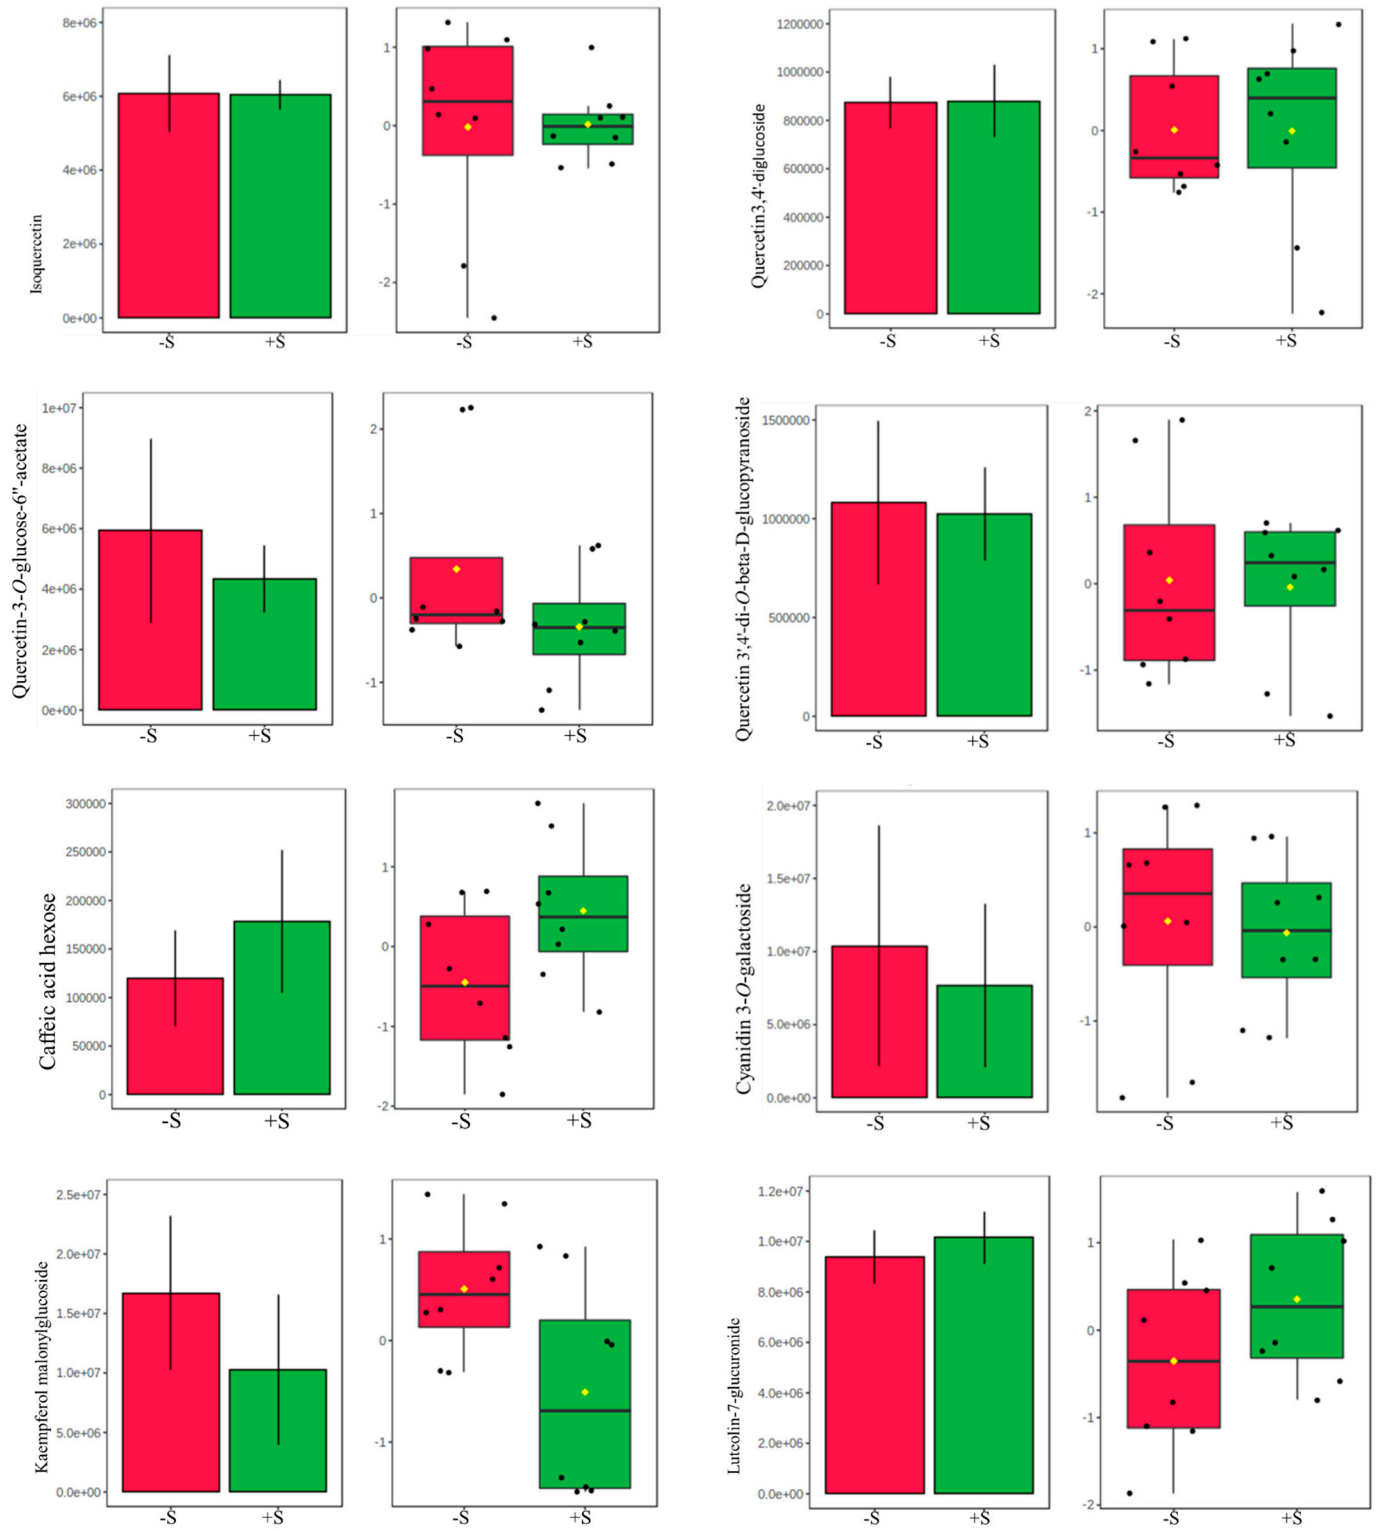

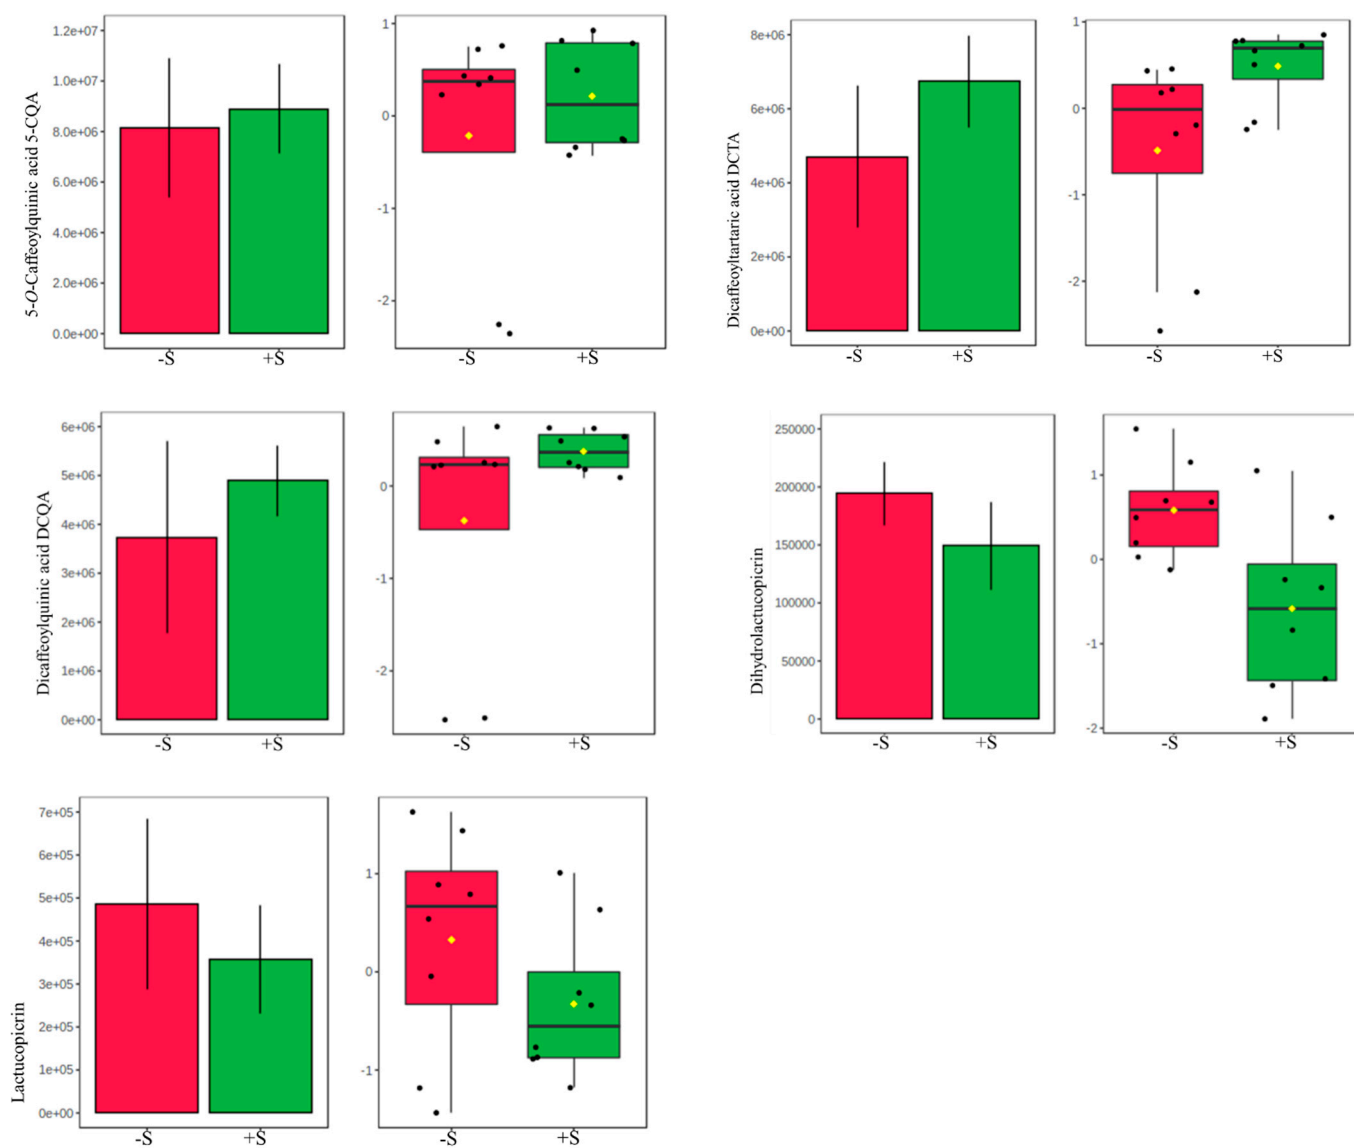

**Figure S2.** Detailed quantitative analysis of compounds detected in multi-leaf red lettuce (V3) grown under  $+S$  and  $-S$  conditions.
